# Supplementary material for: Prevalence of infertility and help seeking among 15 000 women and men
Source: PubMed Central journal article supplement (PMC4991655; doi:10.1093/humrep/dew123), 2016-08-19
Supplement: supp_dew123_dew123supp_table1.pdf [file supp_dew123_dew123supp_table1.pdf]

**Supplementary Table S1** Prevalence of health-related factors associated with infertility by sex.

|                                                            | Women                                    |                    |                         |             |         | Men                                       |                                          |                   |                         |             |         |            |
|------------------------------------------------------------|------------------------------------------|--------------------|-------------------------|-------------|---------|-------------------------------------------|------------------------------------------|-------------------|-------------------------|-------------|---------|------------|
|                                                            | Pregnancy attempt<br>12 months or longer |                    | Age-adjusted regression |             |         | Denominators<br>(unweighted,<br>weighted) | Pregnancy attempt<br>12 months or longer |                   | Age-adjusted regression |             |         |            |
|                                                            | %                                        | 95% CI             | AOR                     | 95% CI      | P-Value |                                           | %                                        | 95% CI            | AOR                     | 95% CI      | P-Value |            |
| All                                                        | <b>12.5%</b>                             | <b>(11.7–13.3)</b> |                         |             |         | 8066, 7052                                | <b>10.1%</b>                             | <b>(9.2–11.1)</b> |                         |             |         | 5553, 6811 |
| Health status and behaviour                                |                                          |                    |                         |             |         |                                           |                                          |                   |                         |             |         |            |
| Longstanding illness, disability or infirmity at interview |                                          |                    |                         |             | 0.5323  |                                           |                                          |                   |                         |             |         | 0.7067     |
| None                                                       | 11.9                                     | (10.9–12.9)        | 1.00                    |             |         | 5528, 4654                                | 9.6                                      | (8.4–10.8)        | 1.00                    |             |         | 3904, 4625 |
| Non-limiting                                               | 13.6                                     | (11.4–16.2)        | 1.10                    | (0.88–1.38) |         | 1109, 1046                                | 11.6                                     | (9.2–14.5)        | 1.14                    | (0.83–1.57) |         | 754, 1050  |
| Limiting                                                   | 13.6                                     | (11.7–15.9)        | 1.10                    | (0.89–1.35) |         | 1428, 1351                                | 11.0                                     | (8.8–13.8)        | 1.07                    | (0.79–1.46) |         | 893, 1135  |
| Body mass index at interview                               |                                          |                    |                         |             | 0.1552  |                                           |                                          |                   |                         |             |         | 0.7047     |
| Underweight/normal)                                        | 11.5                                     | (10.3–12.7)        | 1.00                    | -           |         | 4078, 3378                                | 9.4                                      | (8.1–11.0)        | 1.00                    | -           |         | 2480, 2709 |
| Overweight                                                 | 13.4                                     | (11.8–15.1)        | 1.14                    | (0.95–1.38) |         | 2041, 1913                                | 10.2                                     | (8.7–11.8)        | 1.03                    | (0.80–1.32) |         | 1943, 2612 |
| Obese                                                      | 14.1                                     | (12.1–16.4)        | 1.22                    | (0.98–1.51) |         | 1443, 1347                                | 11.3                                     | (9.2–13.8)        | 1.13                    | (0.85–1.50) |         | 937, 1290  |
| Treated for depression in the last 12 months               |                                          |                    |                         |             | 0.0780  |                                           |                                          |                   |                         |             |         | 0.1560     |
| No                                                         | 12.2                                     | (11.3–13.1)        | 1.00                    |             |         | 6938, 6141                                | 10.0                                     | (9.0–11.0)        | 1.00                    |             |         | 5164, 6390 |
| Yes                                                        | 14.4                                     | (12.0–17.2)        | 1.23                    | (0.98–1.54) |         | 1126, 909                                 | 12.9                                     | 9.2–17.6)         | 1.32                    | (0.90–1.95) |         | 387, 420   |
| Ever smoked regularly                                      |                                          |                    |                         |             | 0.7471  |                                           |                                          |                   |                         |             |         | 0.1897     |
| No                                                         | 12.3                                     | (11.2–13.5)        | 1.00                    | -           |         | 3993, 3648                                | 10.7                                     | (9.3–12.2)        | 1.00                    | -           |         | 2535, 3120 |
| Yes                                                        | 12.6                                     | (11.5–13.9)        | 1.03                    | (0.88–1.20) |         | 4073, 3404                                | 9.7                                      | (8.5–11.0)        | 0.87                    | (0.70–1.07) |         | 3018, 3691 |
| Binge drinking <sup>a</sup>                                |                                          |                    |                         |             | 0.2716  |                                           |                                          |                   |                         |             |         | 0.9991     |
| Never/rarely                                               | 13.1                                     | (12.1–14.2)        | 1.00                    | -           |         | 5121, 4682                                | 10.3                                     | (9.1–11.6)        | 1.00                    | -           |         | 3011, 3924 |
| Monthly                                                    | 11.5                                     | (9.4–13.8)         | 0.93                    | (0.73–1.19) |         | 1121, 846                                 | 9.6                                      | (7.5–12.2)        | 0.99                    | (0.72–1.36) |         | 960, 1074  |
| Minimum weekly                                             | 10.3                                     | (8.0–13.1)         | 0.80                    | (0.60–1.06) |         | 942, 772                                  | 9.8                                      | (7.9–12.1)        | 1.00                    | (0.75–1.32) |         | 1222, 1384 |
| Ever diagnosed with an STI                                 |                                          |                    |                         |             | 0.2631  |                                           |                                          |                   |                         |             |         | 0.0352     |
| No                                                         | 12.3                                     | (11.5–13.3)        | 1.00                    | -           |         | 6650, 5982                                | 9.7                                      | (8.7–10.8)        | 1.00                    | -           |         | 4780, 5870 |
| Yes                                                        | 13.1                                     | (11.1–15.5)        | 1.13                    | (0.91–1.40) |         | 1363, 1023                                | 12.8                                     | (10.0–16.3)       | 1.39                    | (1.02–1.88) |         | 724, 879   |
| Ever diagnosed with chlamydia                              |                                          |                    |                         |             | 0.8825  |                                           |                                          |                   |                         |             |         | 0.0102     |
| No                                                         | 12.5                                     | (11.6–13.4)        | 1.00                    | -           |         | 7357, 6585                                | 9.9                                      | (9.0–11.0)        | 1.00                    | -           |         | 5189, 6442 |
| Yes                                                        | 11.2                                     | (8.5–14.5)         | 0.98                    | (0.71–1.34) |         | 612, 379                                  | 15.0                                     | (10.2–21.4)       | 1.81                    | (1.15–2.84) |         | 275, 257   |

AOR, adjusted odds ratio; 95% CI, 95% confidence intervals.

<sup>a</sup>Binge drinking defined as 'how often do you drink >6 (for women) or >8 (for men) units on one occasion?'

**Supplementary Table SII Prevalence of health-related factors associated with help seeking for infertility by sex.**

|                                               | Women       |                    |      |           |         | Men                                       |             |                    |      |           |         |                                           |
|-----------------------------------------------|-------------|--------------------|------|-----------|---------|-------------------------------------------|-------------|--------------------|------|-----------|---------|-------------------------------------------|
|                                               | %           | 95% CI             | AOR  | 95% CI    | P-Value | Denominators<br>(unweighted,<br>weighted) | %           | 95% CI             | AOR  | 95% CI    | P-Value | Denominators<br>(unweighted,<br>weighted) |
| All                                           | <b>57.3</b> | <b>(53.6–61.0)</b> |      |           |         | <b>923, 879</b>                           | <b>53.2</b> | <b>(48.1–58.1)</b> |      |           |         | 470, 691                                  |
| Health status and behaviour                   |             |                    |      |           |         |                                           |             |                    |      |           |         |                                           |
| Longstanding illness, disability or infirmity |             |                    |      |           | 0.2087  |                                           |             |                    |      |           | 0.7814  |                                           |
| None                                          | 58.1        | (53.7–62.5)        | 1.00 |           |         | 600, 553                                  | 52.3        | (46.0–58.4)        | 1.00 |           |         | 305, 443                                  |
| Non-limiting                                  | 51.9        | (42.6–61.0)        | 0.68 | 0.44–1.04 |         | 136, 142                                  | 57.5        | (45.2–68.9)        | 1.11 | 0.63–1.96 |         | 79, 122                                   |
| Limiting                                      | 59.1        | (50.8–66.9)        | 0.91 | 0.62–1.35 |         | 187, 184                                  | 51.8        | 40.0–63.4)         | 0.87 | 0.50–1.52 |         | 85, 125                                   |
| Body mass index at interview                  |             |                    |      |           | 0.4549  |                                           |             |                    |      |           | 0.7502  |                                           |
| Underweight                                   | 61.9        | (39.3–80.3)        | 1.29 | 0.52–3.18 |         | 22, 17                                    | 44.3        | (10.9–83.7)        | 0.77 | 0.12–4.86 |         | 6, 9                                      |
| Normal                                        | 57.5        | (52.1–62.7)        | 1.00 |           |         | 401, 370                                  | 54.9        | (46.5–63.1)        | 1.00 |           |         | 175, 247                                  |
| Overweight                                    | 61.2        | (54.3–67.6)        | 1.12 | 0.78–1.60 |         | 261, 256                                  | 50.2        | (42.0–58.3)        | 0.77 | 0.47–1.25 |         | 175, 266                                  |
| Obese                                         | 52.8        | (44.5–60.9)        | 0.80 | 0.54–1.19 |         | 191, 190                                  | 54.6        | (43.6–65.1)        | 0.93 | 0.53–1.64 |         | 98, 145                                   |
| Treated for depression in the last 12 months  |             |                    |      |           | 0.6310  |                                           |             |                    |      |           | 0.4820  |                                           |
| No                                            | 57.8        | (53.8–61.7)        | 1.00 |           |         | 771, 748                                  | 53.7        | (48.4–58.9)        | 1.00 |           |         | 426, 637                                  |
| Yes                                           | 54.8        | (45.8–63.6)        | 0.91 | 0.61–1.35 |         | 152, 131                                  | 46.6        | (30.1–63.9)        | 0.77 | 0.37–1.60 |         | 44, 54                                    |
| Ever smoked regularly                         |             |                    |      |           | 0.2400  |                                           |             |                    |      |           | 0.1310  |                                           |
| No                                            | 59.6        | (54.4–64.7)        | 1.00 |           |         | 438, 448                                  | 57.3        | (50.0–64.3)        | 1.00 |           |         | 209, 334                                  |
| Yes                                           | 54.9        | (49.6–60.1)        | 0.84 | 0.62–1.13 |         | 485, 431                                  | 49.3        | (42.4–56.2)        | 0.73 | 0.48–1.10 |         | 261, 357                                  |
| Binge drinking <sup>a</sup>                   |             |                    |      |           | 0.1592  |                                           |             |                    |      |           | 0.0532  |                                           |
| Never or less than monthly                    | 56.1        | (52.0–60.1)        | 1.00 |           |         | 726, 702                                  | 58.1        | (51.7–64.3)        | 1.00 |           |         | 289, 452                                  |
| Monthly                                       | 59.6        | (49.0–69.3)        | 1.28 | 0.81–2.01 |         | 112, 97                                   | 42.4        | (30.9–54.8)        | 0.56 | 0.32–0.99 |         | 78, 103                                   |
| At least weekly                               | 65.9        | (53.9–76.1)        | 1.57 | 0.93–2.63 |         | 84, 79                                    | 44.7        | (34.1–55.9)        | 0.61 | 0.36–1.02 |         | 103, 136                                  |
| Ever diagnosed with an STI                    |             |                    |      |           | 0.5740  |                                           |             |                    |      |           | 0.2220  |                                           |
| No                                            | 57.3        | (53.2–61.3)        | 1.00 |           |         | 755, 738                                  | 55.1        | (49.6–60.5)        | 1.00 |           |         | 385, 569                                  |
| Yes                                           | 58.1        | (49.3–66.5)        | 1.12 | 0.75–1.67 |         | 162, 134                                  | 45.8        | (33.9–58.2)        | 0.71 | 0.42–1.23 |         | 79, 113                                   |
| Ever diagnosed with chlamydia                 |             |                    |      |           | 0.5220  |                                           |             |                    |      |           | 0.1180  |                                           |
| No                                            | 57.9        | (54.0–61.7)        | 1.00 |           |         | 841, 822                                  | 55.0        | (49.7–60.1)        | 1.00 |           |         | 429, 640                                  |
| Yes                                           | 49.2        | (36.0–62.6)        | 0.82 | 0.45–1.49 |         | 68, 42                                    | 34.9        | (18.4–56.1)        | 0.49 | 0.20–1.20 |         | 33, 39                                    |

AOR, adjusted odds ratio; 95% CI, 95% confidence intervals.

<sup>a</sup>Binge drinking defined as 'how often do you drink >6 (for women) or >8 (for men) units on one occasion?'
